# Supplementary material for: Mo2B2 MBene-supported single-atom catalysts as bifunctional HER/OER and OER/ORR electrocatalysts
Source: Royal Society of Chemistry journal article supplement (doi:10.1039/d0ta08630d), 2020-12-10
Supplement: d0ta08630d1.pdf [file d0ta08630d1.pdf]

## Supplementary Information

# **Mo<sub>2</sub>B<sub>2</sub> MBene-supported single-atom catalysts as bifunctional HER/OER and OER/ORR electrocatalysts**

Tian Zhang<sup>1,2#</sup>, Bikun Zhang<sup>1,2#</sup>, Qiong Peng<sup>1,2</sup>, Jian Zhou<sup>1,2\*</sup>, Zhimei Sun<sup>1,2\*</sup>

*School of Materials Science and Engineering, Beihang University, Beijing 100191,  
China*

*Center for Integrated Computational Materials Engineering, International Research  
Institute for Multidisciplinary Science, Beihang University, Beijing 100191, China*

*# These authors contributed equally*

*\*Corresponding Authors: [jzhou@buaa.edu.cn](mailto:jzhou@buaa.edu.cn) (Jian Zhou), [zmsun@buaa.edu.cn](mailto:zmsun@buaa.edu.cn)  
(Zhimei Sun)*

## Tables

**Table. S1** The binding energy  $E_b$  (eV) of different transition metal atoms embedded in Mo monovacancy of  $\text{Mo}_2\text{B}_2$ .

| TM | $E_b$ |
|----|-------|
| Ti | -6.99 |
| V  | -5.97 |
| Cr | -5.38 |
| Mn | -4.55 |
| Fe | -5.02 |
| Co | -4.74 |
| Ni | -6.12 |
| Cu | -5.73 |

**Table. S2** The reaction Gibbs free energy ( $\Delta G_1$ ,  $\Delta G_2$ ,  $\Delta G_3$  and  $\Delta G_4$ ) of four elementary steps and overpotential ( $\eta_{\text{OER}}$ ) for OER at site I.

| TM@Mo <sub>2</sub> B <sub>2</sub> | $\Delta G_1/\text{eV}$ | $\Delta G_2/\text{eV}$ | $\Delta G_3/\text{eV}$ | $\Delta G_4/\text{eV}$ | $\eta_{\text{OER}}/\text{V}$ |
|-----------------------------------|------------------------|------------------------|------------------------|------------------------|------------------------------|
| Ti@Mo <sub>2</sub> B <sub>2</sub> | -1.32                  | -0.25                  | 3.86                   | 2.63                   | 2.63                         |
| V@Mo <sub>2</sub> B <sub>2</sub>  | -0.98                  | -0.24                  | 3.80                   | 2.34                   | 2.57                         |
| Cr@Mo <sub>2</sub> B <sub>2</sub> | -1.29                  | -0.05                  | 3.32                   | 2.94                   | 2.09                         |
| Mn@Mo <sub>2</sub> B <sub>2</sub> | 0.44                   | 0.74                   | 2.84                   | 0.90                   | 1.61                         |
| Fe@Mo <sub>2</sub> B <sub>2</sub> | -0.45                  | 0.95                   | 2.26                   | 2.16                   | 1.03                         |
| Co@Mo <sub>2</sub> B <sub>2</sub> | 0.16                   | 0.82                   | 2.13                   | 1.81                   | 0.90                         |
| Ni@Mo <sub>2</sub> B <sub>2</sub> | 0.63                   | 1.17                   | 1.75                   | 1.37                   | 0.52                         |
| Cu@Mo <sub>2</sub> B <sub>2</sub> | 1.02                   | 1.54                   | 0.89                   | 1.48                   | 0.31                         |

**Table. S3** The reaction free energy ( $\Delta G_1$ ,  $\Delta G_2$ ,  $\Delta G_3$  and  $\Delta G_4$ ) of four elementary steps and overpotential ( $\eta_{\text{OER}}$ ) for OER at site II.

| TM@Mo <sub>2</sub> B <sub>2</sub> | $\Delta G_1/\text{eV}$ | $\Delta G_2/\text{eV}$ | $\Delta G_3/\text{eV}$ | $\Delta G_4/\text{eV}$ | $\eta_{\text{OER}}/\text{V}$ |
|-----------------------------------|------------------------|------------------------|------------------------|------------------------|------------------------------|
| Ti@Mo <sub>2</sub> B <sub>2</sub> | -0.37                  | -1.30                  | 4.67                   | 1.92                   | 3.47                         |
| V@Mo <sub>2</sub> B <sub>2</sub>  | -0.39                  | -0.83                  | 4.16                   | 1.94                   | 2.93                         |
| Cr@Mo <sub>2</sub> B <sub>2</sub> | -1.18                  | -0.16                  | 3.32                   | 1.93                   | 2.10                         |
| Mn@Mo <sub>2</sub> B <sub>2</sub> | -0.85                  | 0.32                   | 2.80                   | 0.94                   | 1.57                         |
| Fe@Mo <sub>2</sub> B <sub>2</sub> | -0.86                  | 1.36                   | 2.71                   | 1.71                   | 1.48                         |
| Co@Mo <sub>2</sub> B <sub>2</sub> | -0.84                  | 1.82                   | 2.31                   | 1.63                   | 1.08                         |
| Ni@Mo <sub>2</sub> B <sub>2</sub> | -0.46                  | 2.26                   | 1.63                   | 1.49                   | 1.03                         |
| Cu@Mo <sub>2</sub> B <sub>2</sub> | -0.32                  | 2.87                   | 0.76                   | 1.60                   | 1.64                         |

**Table. S4** The reaction free energy ( $\Delta G_1$ ,  $\Delta G_2$ ,  $\Delta G_3$  and  $\Delta G_4$ ) of four elementary steps and overpotential ( $\eta_{\text{OER}}$ ) for OER at site III.

| TM@Mo <sub>2</sub> B <sub>2</sub> | $\Delta G_1/\text{eV}$ | $\Delta G_2/\text{eV}$ | $\Delta G_3/\text{eV}$ | $\Delta G_4/\text{eV}$ | $\eta_{\text{OER}}/\text{V}$ |
|-----------------------------------|------------------------|------------------------|------------------------|------------------------|------------------------------|
| Ti@Mo <sub>2</sub> B <sub>2</sub> | -1.25                  | 0.53                   | 4.10                   | 1.54                   | 2.87                         |
| V@Mo <sub>2</sub> B <sub>2</sub>  | -0.21                  | -0.63                  | 3.89                   | 1.87                   | 2.66                         |
| Cr@Mo <sub>2</sub> B <sub>2</sub> | -1.24                  | -0.24                  | 3.12                   | 3.28                   | 2.05                         |
| Mn@Mo <sub>2</sub> B <sub>2</sub> | -0.27                  | -0.27                  | 2.31                   | 1.93                   | 1.08                         |
| Fe@Mo <sub>2</sub> B <sub>2</sub> | -0.98                  | -0.98                  | 4.36                   | 1.51                   | 3.13                         |
| Co@Mo <sub>2</sub> B <sub>2</sub> | -0.52                  | -0.52                  | 3.90                   | 1.76                   | 2.67                         |
| Ni@Mo <sub>2</sub> B <sub>2</sub> | -0.09                  | -0.09                  | 3.98                   | 1.26                   | 2.75                         |
| Cu@Mo <sub>2</sub> B <sub>2</sub> | -0.13                  | -0.13                  | 3.92                   | 1.38                   | 2.70                         |

**Table. S5** The reaction free energy ( $\Delta G_1$ ,  $\Delta G_2$ ,  $\Delta G_3$  and  $\Delta G_4$ ) of four elementary steps and overpotential ( $\eta_{\text{OER}}$ ) for OER at site IV.

| TM@Mo <sub>2</sub> B <sub>2</sub> | $\Delta G_1/\text{eV}$ | $\Delta G_2/\text{eV}$ | $\Delta G_3/\text{eV}$ | $\Delta G_4/\text{eV}$ | $\eta_{\text{OER}}/\text{V}$ |
|-----------------------------------|------------------------|------------------------|------------------------|------------------------|------------------------------|
| Ti@Mo <sub>2</sub> B <sub>2</sub> | -0.62                  | -0.19                  | 3.98                   | 1.37                   | 2.75                         |
| V@Mo <sub>2</sub> B <sub>2</sub>  | -0.27                  | -0.51                  | 4.68                   | 1.02                   | 3.45                         |
| Cr@Mo <sub>2</sub> B <sub>2</sub> | -1.13                  | -0.30                  | 5.17                   | 1.18                   | 3.94                         |
| Mn@Mo <sub>2</sub> B <sub>2</sub> | 0.73                   | -0.15                  | -0.64                  | 4.98                   | 3.75                         |
| Fe@Mo <sub>2</sub> B <sub>2</sub> | -0.91                  | -0.09                  | 3.59                   | 2.32                   | 2.36                         |
| Co@Mo <sub>2</sub> B <sub>2</sub> | -0.56                  | -0.46                  | 4.36                   | 1.58                   | 3.13                         |
| Ni@Mo <sub>2</sub> B <sub>2</sub> | -0.33                  | -0.33                  | 4.18                   | 1.40                   | 2.95                         |
| Cu@Mo <sub>2</sub> B <sub>2</sub> | -0.35                  | -0.18                  | 4.00                   | 1.45                   | 2.77                         |

**Table. S6** The reaction free energy ( $\Delta G_1$ ,  $\Delta G_2$ ,  $\Delta G_3$  and  $\Delta G_4$ ) of four elementary steps and overpotential ( $\eta_{\text{OER}}$ ) for OER at site V.

| TM@Mo <sub>2</sub> B <sub>2</sub> | $\Delta G_1/\text{eV}$ | $\Delta G_2/\text{eV}$ | $\Delta G_3/\text{eV}$ | $\Delta G_4/\text{eV}$ | $\eta_{\text{OER}}/\text{V}$ |
|-----------------------------------|------------------------|------------------------|------------------------|------------------------|------------------------------|
| Ti@Mo <sub>2</sub> B <sub>2</sub> | 2.22                   | 1.42                   | -5.42                  | 6.70                   | 5.47                         |
| V@Mo <sub>2</sub> B <sub>2</sub>  | -1.14                  | 5.89                   | -4.93                  | 5.10                   | 4.66                         |
| Cr@Mo <sub>2</sub> B <sub>2</sub> | -1.46                  | 1.06                   | 0.49                   | 4.83                   | 3.60                         |
| Mn@Mo <sub>2</sub> B <sub>2</sub> | 0.32                   | 1.07                   | -0.32                  | 3.85                   | 2.62                         |
| Fe@Mo <sub>2</sub> B <sub>2</sub> | -1.33                  | 0.87                   | 1.18                   | 4.21                   | 2.98                         |
| Co@Mo <sub>2</sub> B <sub>2</sub> | -0.43                  | 0.47                   | -1.07                  | 5.95                   | 4.72                         |
| Ni@Mo <sub>2</sub> B <sub>2</sub> | -0.75                  | 0.94                   | -1.18                  | 5.91                   | 4.68                         |
| Cu@Mo <sub>2</sub> B <sub>2</sub> | -1.05                  | 1.14                   | 0.82                   | 4.02                   | 2.79                         |

**Table. S7** The reaction free energy ( $\Delta G_1$ ,  $\Delta G_2$ ,  $\Delta G_3$  and  $\Delta G_4$ ) of four elementary steps and overpotential ( $\eta_{\text{OER}}$ ) for OER at site VI.

| TM@Mo <sub>2</sub> B <sub>2</sub> | $\Delta G_1/\text{eV}$ | $\Delta G_2/\text{eV}$ | $\Delta G_3/\text{eV}$ | $\Delta G_4/\text{eV}$ | $\eta_{\text{OER}}/\text{V}$ |
|-----------------------------------|------------------------|------------------------|------------------------|------------------------|------------------------------|
| Ti@Mo <sub>2</sub> B <sub>2</sub> | -1.45                  | 3.69                   | -3.51                  | 6.19                   | 4.96                         |
| V@Mo <sub>2</sub> B <sub>2</sub>  | -1.17                  | 6.00                   | -5.58                  | 5.66                   | 4.43                         |
| Cr@Mo <sub>2</sub> B <sub>2</sub> | -1.56                  | 0.14                   | 1.25                   | 5.09                   | 3.86                         |
| Mn@Mo <sub>2</sub> B <sub>2</sub> | 0.91                   | 0.50                   | 2.55                   | 0.95                   | 1.32                         |
| Fe@Mo <sub>2</sub> B <sub>2</sub> | -0.41                  | -0.20                  | 0.20                   | 5.32                   | 4.09                         |
| Co@Mo <sub>2</sub> B <sub>2</sub> | -0.29                  | 0.13                   | 0.70                   | 4.37                   | 3.14                         |
| Ni@Mo <sub>2</sub> B <sub>2</sub> | -0.39                  | 0.79                   | -1.70                  | 6.22                   | 4.99                         |
| Cu@Mo <sub>2</sub> B <sub>2</sub> | -0.48                  | 3.25                   | -4.21                  | 6.35                   | 5.12                         |



**Table. S8** The reaction free energy ( $\Delta G_1$ ,  $\Delta G_2$ ,  $\Delta G_3$  and  $\Delta G_4$ ) of four elementary steps and overpotential ( $\eta_{\text{OER}}$ ) for OER at site VII.

| TM@Mo <sub>2</sub> B <sub>2</sub> | $\Delta G_1/\text{eV}$ | $\Delta G_2/\text{eV}$ | $\Delta G_3/\text{eV}$ | $\Delta G_4/\text{eV}$ | $\eta_{\text{OER}}/\text{V}$ |
|-----------------------------------|------------------------|------------------------|------------------------|------------------------|------------------------------|
| Ti@Mo <sub>2</sub> B <sub>2</sub> | -1.63                  | 0.36                   | 0.23                   | 5.96                   | 4.73                         |
| V@Mo <sub>2</sub> B <sub>2</sub>  | -1.06                  | -0.30                  | 0.55                   | 5.73                   | 4.50                         |
| Cr@Mo <sub>2</sub> B <sub>2</sub> | -1.73                  | 0.86                   | -1.00                  | 6.80                   | 5.57                         |
| Mn@Mo <sub>2</sub> B <sub>2</sub> | 1.41                   | -0.30                  | -0.42                  | 4.24                   | 3.01                         |
| Fe@Mo <sub>2</sub> B <sub>2</sub> | -0.78                  | 0.30                   | 0.02                   | 5.38                   | 4.15                         |
| Co@Mo <sub>2</sub> B <sub>2</sub> | -0.59                  | -0.30                  | -0.86                  | 6.67                   | 5.44                         |
| Ni@Mo <sub>2</sub> B <sub>2</sub> | -0.48                  | -0.15                  | -0.81                  | 6.37                   | 5.14                         |
| Cu@Mo <sub>2</sub> B <sub>2</sub> | -0.07                  | -0.43                  | -0.88                  | 6.31                   | 5.08                         |

**Table. S9** The reaction free energy ( $\Delta G_a$ ,  $\Delta G_b$ ,  $\Delta G_c$  and  $\Delta G_d$ ) of four elementary steps and overpotential ( $\eta_{\text{ORR}}$ ) for ORR at site I.

| TM@Mo <sub>2</sub> B <sub>2</sub> | $\Delta G_a/\text{eV}$ | $\Delta G_b/\text{eV}$ | $\Delta G_c/\text{eV}$ | $\Delta G_d/\text{eV}$ | $\eta_{\text{ORR}}/\text{V}$ |
|-----------------------------------|------------------------|------------------------|------------------------|------------------------|------------------------------|
| Ti@Mo <sub>2</sub> B <sub>2</sub> | -2.63                  | -3.86                  | 0.25                   | 1.32                   | 2.55                         |
| V@Mo <sub>2</sub> B <sub>2</sub>  | -2.34                  | -3.80                  | 0.24                   | 0.98                   | 2.21                         |
| Cr@Mo <sub>2</sub> B <sub>2</sub> | -2.94                  | -3.32                  | 0.05                   | 1.29                   | 2.52                         |
| Mn@Mo <sub>2</sub> B <sub>2</sub> | -0.90                  | -2.84                  | -0.74                  | -0.44                  | 0.79                         |
| Fe@Mo <sub>2</sub> B <sub>2</sub> | -2.16                  | -2.26                  | -0.95                  | 0.45                   | 1.68                         |
| Co@Mo <sub>2</sub> B <sub>2</sub> | -1.81                  | -2.13                  | -0.82                  | -0.16                  | 1.07                         |
| Ni@Mo <sub>2</sub> B <sub>2</sub> | -1.37                  | -1.75                  | -1.17                  | -0.63                  | 0.60                         |
| Cu@Mo <sub>2</sub> B <sub>2</sub> | -1.48                  | -0.89                  | -1.54                  | -1.02                  | 0.34                         |

**Table. S10** The reaction free energy ( $\Delta G_a$ ,  $\Delta G_b$ ,  $\Delta G_c$  and  $\Delta G_d$ ) of four elementary steps and overpotential ( $\eta_{\text{ORR}}$ ) for ORR at site II.

| TM@Mo <sub>2</sub> B <sub>2</sub> | $\Delta G_a/\text{eV}$ | $\Delta G_b/\text{eV}$ | $\Delta G_c/\text{eV}$ | $\Delta G_d/\text{eV}$ | $\eta_{\text{ORR}}/\text{V}$ |
|-----------------------------------|------------------------|------------------------|------------------------|------------------------|------------------------------|
| Ti@Mo <sub>2</sub> B <sub>2</sub> | -1.92                  | -4.67                  | 1.30                   | 0.37                   | 2.53                         |
| V@Mo <sub>2</sub> B <sub>2</sub>  | -1.97                  | -4.16                  | 0.83                   | 0.39                   | 2.06                         |
| Cr@Mo <sub>2</sub> B <sub>2</sub> | -2.93                  | -3.33                  | 0.16                   | 1.18                   | 2.41                         |
| Mn@Mo <sub>2</sub> B <sub>2</sub> | -0.94                  | -2.80                  | -0.32                  | -0.85                  | 0.91                         |
| Fe@Mo <sub>2</sub> B <sub>2</sub> | -1.71                  | -2.71                  | -1.36                  | 0.86                   | 2.09                         |
| Co@Mo <sub>2</sub> B <sub>2</sub> | -1.63                  | -2.31                  | -1.82                  | 0.84                   | 2.07                         |
| Ni@Mo <sub>2</sub> B <sub>2</sub> | -1.50                  | -1.63                  | -2.26                  | 0.46                   | 1.69                         |
| Cu@Mo <sub>2</sub> B <sub>2</sub> | -1.60                  | -0.76                  | -2.87                  | 0.32                   | 1.55                         |

**Table. S11** The reaction free energy ( $\Delta G_a$ ,  $\Delta G_b$ ,  $\Delta G_c$  and  $\Delta G_d$ ) of four elementary steps and overpotential ( $\eta_{\text{ORR}}$ ) for ORR at site III.

| TM@Mo <sub>2</sub> B <sub>2</sub> | $\Delta G_a/\text{eV}$ | $\Delta G_b/\text{eV}$ | $\Delta G_c/\text{eV}$ | $\Delta G_d/\text{eV}$ | $\eta_{\text{ORR}}/\text{V}$ |
|-----------------------------------|------------------------|------------------------|------------------------|------------------------|------------------------------|
| Ti@Mo <sub>2</sub> B <sub>2</sub> | -1.54                  | -4.10                  | -0.53                  | 1.25                   | 2.48                         |
| V@Mo <sub>2</sub> B <sub>2</sub>  | -1.87                  | -3.89                  | 0.63                   | 0.21                   | 1.86                         |
| Cr@Mo <sub>2</sub> B <sub>2</sub> | -3.28                  | -3.12                  | 0.24                   | 1.24                   | 2.47                         |
| Mn@Mo <sub>2</sub> B <sub>2</sub> | -1.93                  | -2.31                  | -0.96                  | 0.27                   | 1.50                         |
| Fe@Mo <sub>2</sub> B <sub>2</sub> | -1.51                  | -4.36                  | -0.03                  | 0.98                   | 2.21                         |
| Co@Mo <sub>2</sub> B <sub>2</sub> | -1.76                  | -3.90                  | 0.23                   | 0.52                   | 1.75                         |
| Ni@Mo <sub>2</sub> B <sub>2</sub> | -1.26                  | -3.98                  | 0.23                   | 0.09                   | 1.46                         |
| Cu@Mo <sub>2</sub> B <sub>2</sub> | -1.38                  | -3.93                  | 0.26                   | 0.13                   | 1.49                         |

**Table. S12** The reaction free energy ( $\Delta G_a$ ,  $\Delta G_b$ ,  $\Delta G_c$  and  $\Delta G_d$ ) of four elementary steps and overpotential ( $\eta_{\text{ORR}}$ ) for ORR at site IV.

| TM@Mo <sub>2</sub> B <sub>2</sub> | $\Delta G_a/\text{eV}$ | $\Delta G_b/\text{eV}$ | $\Delta G_c/\text{eV}$ | $\Delta G_d/\text{eV}$ | $\eta_{\text{ORR}}/\text{V}$ |
|-----------------------------------|------------------------|------------------------|------------------------|------------------------|------------------------------|
| Ti@Mo <sub>2</sub> B <sub>2</sub> | -1.37                  | -3.98                  | -0.19                  | 0.62                   | 1.85                         |
| V@Mo <sub>2</sub> B <sub>2</sub>  | -1.02                  | -4.68                  | 0.51                   | 0.27                   | 1.74                         |
| Cr@Mo <sub>2</sub> B <sub>2</sub> | -1.18                  | -5.17                  | 0.30                   | 1.13                   | 2.36                         |
| Mn@Mo <sub>2</sub> B <sub>2</sub> | -4.98                  | 0.64                   | 0.15                   | -0.73                  | 1.87                         |
| Fe@Mo <sub>2</sub> B <sub>2</sub> | -2.33                  | -3.59                  | 0.09                   | 0.91                   | 2.14                         |
| Co@Mo <sub>2</sub> B <sub>2</sub> | -1.58                  | -4.36                  | 0.46                   | 0.56                   | 1.79                         |
| Ni@Mo <sub>2</sub> B <sub>2</sub> | -1.40                  | -4.18                  | 0.33                   | 0.33                   | 1.56                         |
| Cu@Mo <sub>2</sub> B <sub>2</sub> | -1.45                  | -4.00                  | 0.18                   | 0.35                   | 1.58                         |

**Table. S13** The reaction free energy ( $\Delta G_a$ ,  $\Delta G_b$ ,  $\Delta G_c$  and  $\Delta G_d$ ) of four elementary steps and overpotential ( $\eta_{\text{ORR}}$ ) for ORR at site V.

| TM@Mo <sub>2</sub> B <sub>2</sub> | $\Delta G_a/\text{eV}$ | $\Delta G_b/\text{eV}$ | $\Delta G_c/\text{eV}$ | $\Delta G_d/\text{eV}$ | $\eta_{\text{ORR}}/\text{V}$ |
|-----------------------------------|------------------------|------------------------|------------------------|------------------------|------------------------------|
| Ti@Mo <sub>2</sub> B <sub>2</sub> | -6.70                  | 5.42                   | -1.42                  | -2.22                  | 6.65                         |
| V@Mo <sub>2</sub> B <sub>2</sub>  | -5.10                  | 4.93                   | -5.89                  | 1.14                   | 6.16                         |
| Cr@Mo <sub>2</sub> B <sub>2</sub> | -4.83                  | -0.49                  | -1.06                  | 1.46                   | 2.69                         |
| Mn@Mo <sub>2</sub> B <sub>2</sub> | -3.85                  | 0.32                   | -1.07                  | -0.33                  | 1.55                         |
| Fe@Mo <sub>2</sub> B <sub>2</sub> | -4.21                  | -1.18                  | -0.87                  | 1.33                   | 2.56                         |
| Co@Mo <sub>2</sub> B <sub>2</sub> | -5.95                  | 1.07                   | -0.47                  | 0.43                   | 2.30                         |
| Ni@Mo <sub>2</sub> B <sub>2</sub> | -5.91                  | 1.18                   | -0.94                  | 0.75                   | 2.41                         |
| Cu@Mo <sub>2</sub> B <sub>2</sub> | -4.02                  | -0.82                  | -1.14                  | 1.05                   | 2.28                         |

**Table. S14** The reaction free energy ( $\Delta G_a$ ,  $\Delta G_b$ ,  $\Delta G_c$  and  $\Delta G_d$ ) of four elementary steps and overpotential ( $\eta_{\text{ORR}}$ ) for ORR at site VI.

| TM@Mo <sub>2</sub> B <sub>2</sub> | $\Delta G_a/\text{eV}$ | $\Delta G_b/\text{eV}$ | $\Delta G_c/\text{eV}$ | $\Delta G_d/\text{eV}$ | $\eta_{\text{ORR}}/\text{V}$ |
|-----------------------------------|------------------------|------------------------|------------------------|------------------------|------------------------------|
| Ti@Mo <sub>2</sub> B <sub>2</sub> | -6.19                  | 3.51                   | -3.69                  | 1.45                   | 4.74                         |
| V@Mo <sub>2</sub> B <sub>2</sub>  | -5.66                  | 5.58                   | -6.00                  | 1.17                   | 6.81                         |
| Cr@Mo <sub>2</sub> B <sub>2</sub> | -5.09                  | -1.25                  | -0.14                  | 1.56                   | 2.79                         |
| Mn@Mo <sub>2</sub> B <sub>2</sub> | -0.95                  | -2.55                  | -0.50                  | -0.91                  | 0.73                         |
| Fe@Mo <sub>2</sub> B <sub>2</sub> | -5.32                  | -0.20                  | 0.20                   | 0.41                   | 1.64                         |
| Co@Mo <sub>2</sub> B <sub>2</sub> | -4.37                  | -0.70                  | -0.13                  | 0.29                   | 1.52                         |
| Ni@Mo <sub>2</sub> B <sub>2</sub> | -6.22                  | 1.70                   | -0.79                  | 0.39                   | 1.62                         |
| Cu@Mo <sub>2</sub> B <sub>2</sub> | -6.35                  | 4.21                   | -3.25                  | 0.48                   | 1.71                         |

**Table. S15** The reaction free energy ( $\Delta G_a$ ,  $\Delta G_b$ ,  $\Delta G_c$  and  $\Delta G_d$ ) of four elementary steps and overpotential ( $\eta_{\text{ORR}}$ ) for ORR at site VII.

| TM@Mo <sub>2</sub> B <sub>2</sub> | $\Delta G_a/\text{eV}$ | $\Delta G_b/\text{eV}$ | $\Delta G_c/\text{eV}$ | $\Delta G_d/\text{eV}$ | $\eta_{\text{ORR}}/\text{V}$ |
|-----------------------------------|------------------------|------------------------|------------------------|------------------------|------------------------------|
| Ti@Mo <sub>2</sub> B <sub>2</sub> | -5.96                  | -0.23                  | -0.36                  | 1.63                   | 2.86                         |
| V@Mo <sub>2</sub> B <sub>2</sub>  | -5.73                  | -0.56                  | 0.30                   | 1.06                   | 2.29                         |
| Cr@Mo <sub>2</sub> B <sub>2</sub> | -6.80                  | 1.00                   | -0.86                  | 1.73                   | 2.96                         |
| Mn@Mo <sub>2</sub> B <sub>2</sub> | -4.24                  | 0.42                   | 0.30                   | -1.41                  | 1.65                         |
| Fe@Mo <sub>2</sub> B <sub>2</sub> | -5.38                  | -0.02                  | -0.30                  | 0.78                   | 2.01                         |
| Co@Mo <sub>2</sub> B <sub>2</sub> | -6.67                  | 0.86                   | 0.30                   | 0.59                   | 2.09                         |
| Ni@Mo <sub>2</sub> B <sub>2</sub> | -6.37                  | 0.81                   | 0.15                   | 0.48                   | 2.04                         |
| Cu@Mo <sub>2</sub> B <sub>2</sub> | -6.31                  | 0.88                   | 0.43                   | 0.07                   | 2.11                         |



**Table. S16** The reaction free energy ( $\Delta G_1$ ,  $\Delta G_2$ ,  $\Delta G_3$  and  $\Delta G_4$ ) and overpotential ( $\eta$ ) of pristine  $\text{Mo}_2\text{B}_2$  for OER and ORR.

| $\text{Mo}_2\text{B}_2$ | $\Delta G_1(\Delta G_a)/\text{eV}$ | $\Delta G_2(\Delta G_b)/\text{eV}$ | $\Delta G_3(\Delta G_c)/\text{eV}$ | $\Delta G_4((\Delta G_d))/\text{eV}$ | $\eta/\text{V}$ |
|-------------------------|------------------------------------|------------------------------------|------------------------------------|--------------------------------------|-----------------|
| OER                     | -0.27                              | -0.27                              | 3.90                               | 1.56                                 | 2.67            |
| ORR                     | -1.56                              | -3.90                              | 0.27                               | 0.27                                 | 1.50            |

**Table. S17** The total energy ( $E/\text{eV}$ ) of H adsorbed on  $\text{TM}@Mo_2B_2$  at different surface active sites.

| $\text{TM}@Mo_2B_2$         | $E(\text{I})/\text{eV}$ | $E(\text{II})/\text{eV}$ | $E(\text{III})/\text{eV}$ | $E(\text{IV})/\text{eV}$ | $E(\text{VII})/\text{eV}$ |
|-----------------------------|-------------------------|--------------------------|---------------------------|--------------------------|---------------------------|
| Ti@ $\text{Mo}_2\text{B}_2$ | -335.68                 | -335.95                  | -335.96                   | -335.67                  | -336.87                   |
| V@ $\text{Mo}_2\text{B}_2$  | -335.72                 | -335.92                  | -335.47                   | -334.85                  | -336.55                   |
| Cr@ $\text{Mo}_2\text{B}_2$ | -335.81                 | -336.50                  | -335.42                   | -335.67                  | -336.26                   |
| Mn@ $\text{Mo}_2\text{B}_2$ | -334.92                 | -334.67                  | -334.86                   | -335.22                  | -335.53                   |
| Fe@ $\text{Mo}_2\text{B}_2$ | -333.72                 | -334.21                  | -334.62                   | -334.44                  | -334.87                   |
| Co@ $\text{Mo}_2\text{B}_2$ | -333.54                 | -333.38                  | -331.90                   | -332.65                  | -333.79                   |
| Ni@ $\text{Mo}_2\text{B}_2$ | -332.27                 | -332.35                  | -332.10                   | -332.50                  | -332.72                   |
| Cu@ $\text{Mo}_2\text{B}_2$ | -330.12                 | -331.19                  | -330.26                   | -330.85                  | -331.61                   |

**Table. S18** Adsorption free energies of \*H ( $\Delta G_H$ ) at different surface active sites under 1/16 hydrogen coverage condition. The promising candidates ( $|\Delta G_H| < 0.2$  eV) are highlighted in bold typeface.

| TM@Mo <sub>2</sub> B <sub>2</sub> | $\Delta G_H(\text{I})/\text{eV}$ | $\Delta G_H(\text{II})/\text{eV}$ | $\Delta G_H(\text{III})/\text{eV}$ | $\Delta G_H(\text{IV})/\text{eV}$ | $\Delta G_H(\text{VII})/\text{eV}$ |
|-----------------------------------|----------------------------------|-----------------------------------|------------------------------------|-----------------------------------|------------------------------------|
| Ti@Mo <sub>2</sub> B <sub>2</sub> | <b>-0.04</b>                     | -0.31                             | -0.32                              | <b>-0.04</b>                      | -1.24                              |
| V@Mo <sub>2</sub> B <sub>2</sub>  | <b>0.05</b>                      | <b>-0.15</b>                      | 0.29                               | 0.91                              | -0.78                              |
| Cr@Mo <sub>2</sub> B <sub>2</sub> | <b>-0.08</b>                     | -0.77                             | 0.31                               | <b>0.06</b>                       | -0.53                              |
| Mn@Mo <sub>2</sub> B <sub>2</sub> | -0.68                            | -0.43                             | -0.62                              | -0.98                             | -1.29                              |
| Fe@Mo <sub>2</sub> B <sub>2</sub> | 0.39                             | <b>-0.10</b>                      | 0.51                               | -0.33                             | -0.76                              |
| Co@Mo <sub>2</sub> B <sub>2</sub> | -0.94                            | -0.77                             | 0.71                               | <b>-0.04</b>                      | -1.18                              |
| Ni@Mo <sub>2</sub> B <sub>2</sub> | <b>0.18</b>                      | <b>-0.10</b>                      | 0.35                               | <b>-0.05</b>                      | -0.27                              |
| Cu@Mo <sub>2</sub> B <sub>2</sub> | 0.28                             | -0.79                             | <b>0.14</b>                        | -0.45                             | -1.21                              |

**Table. S19** The reaction free energy ( $\Delta G_1$ ,  $\Delta G_2$ ) of elementary step for 2e<sup>-</sup> ORR at site

I.

| TM@Mo <sub>2</sub> B <sub>2</sub> | $\Delta G_1/\text{eV}$ | $\Delta G_2/\text{eV}$ |
|-----------------------------------|------------------------|------------------------|
| Ni@Mo <sub>2</sub> B <sub>2</sub> | -1.37                  | 0.36                   |
| Cu@Mo <sub>2</sub> B <sub>2</sub> | -1.48                  | 0.47                   |

**Table. S20** Adsorption free energies of \*H ( $\Delta G_{\text{H}}$ ) under 1/16, 1/9 and 1/4 hydrogen coverage conditions at site I for Ni@Mo<sub>2</sub>B<sub>2</sub>.

| hydrogen coverage | $\Delta G_{\text{H}}/\text{eV}$ |
|-------------------|---------------------------------|
| 1/4               | -0.09                           |
| 1/9               | 0.12                            |
| 1/16              | 0.18                            |

## Figures

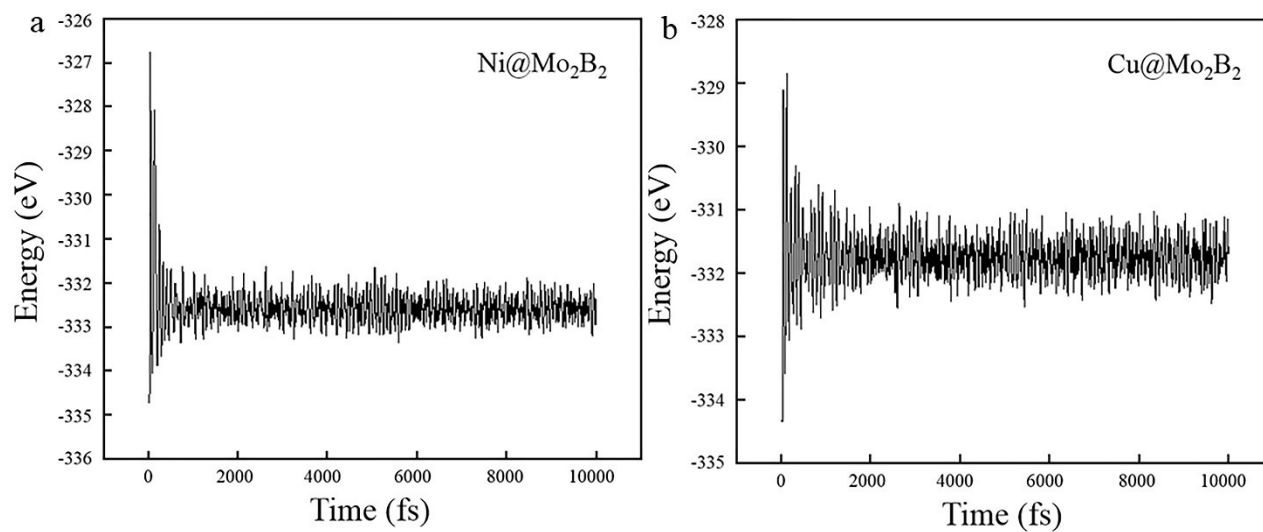

**Fig. S1** Total potential energy fluctuations after equilibration for Ni@Mo<sub>2</sub>B<sub>2</sub> and Cu@Mo<sub>2</sub>B<sub>2</sub> in the AIMD simulation at 300 K after a time scale of 10 ps.

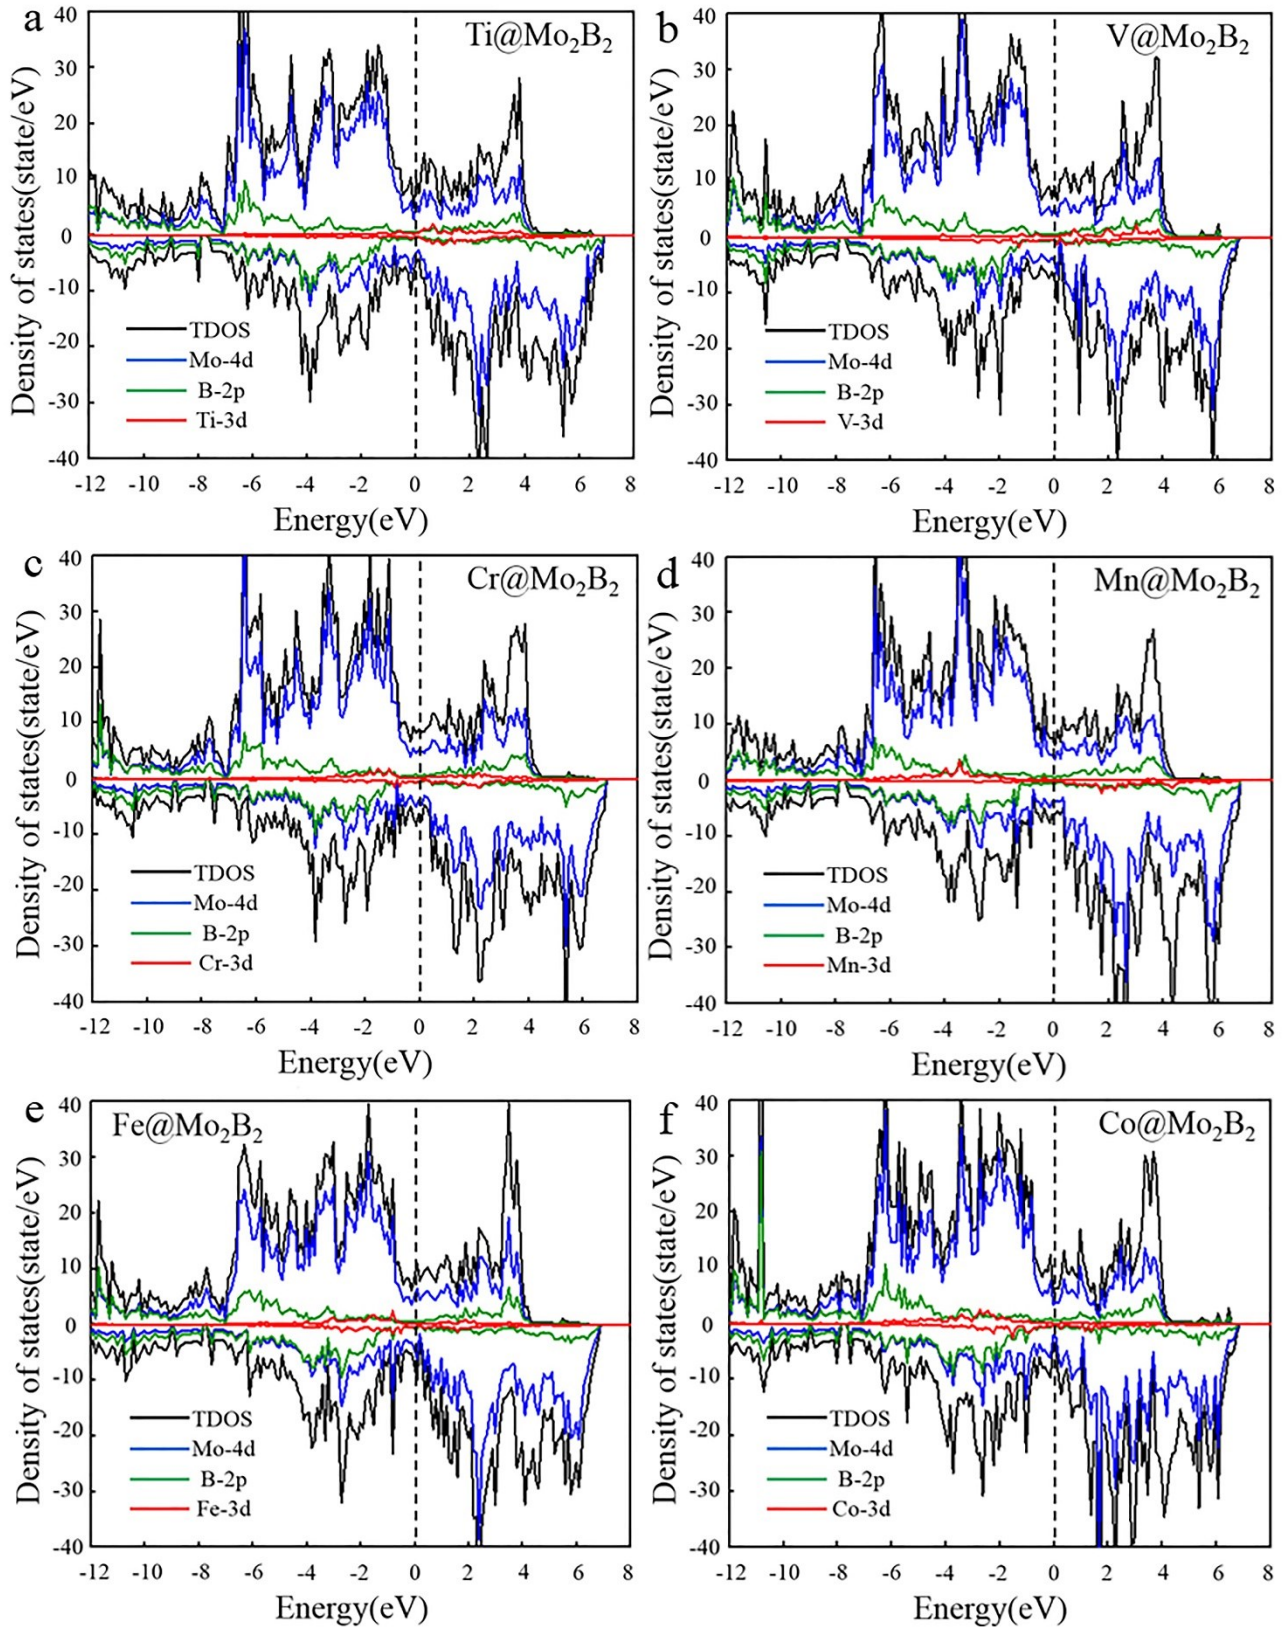

**Fig. S2** The total density of states (TDOS) and projected density of states (PDOS) of (a)  $\text{Ti@Mo}_2\text{B}_2$ , (b)  $\text{V@Mo}_2\text{B}_2$ , (c)  $\text{Cr@Mo}_2\text{B}_2$ , (d)  $\text{Mn@Mo}_2\text{B}_2$ , (e)  $\text{Fe@Mo}_2\text{B}_2$  and (f)

Co@Mo<sub>2</sub>B<sub>2</sub>, where the Fermi level is set to 0 eV

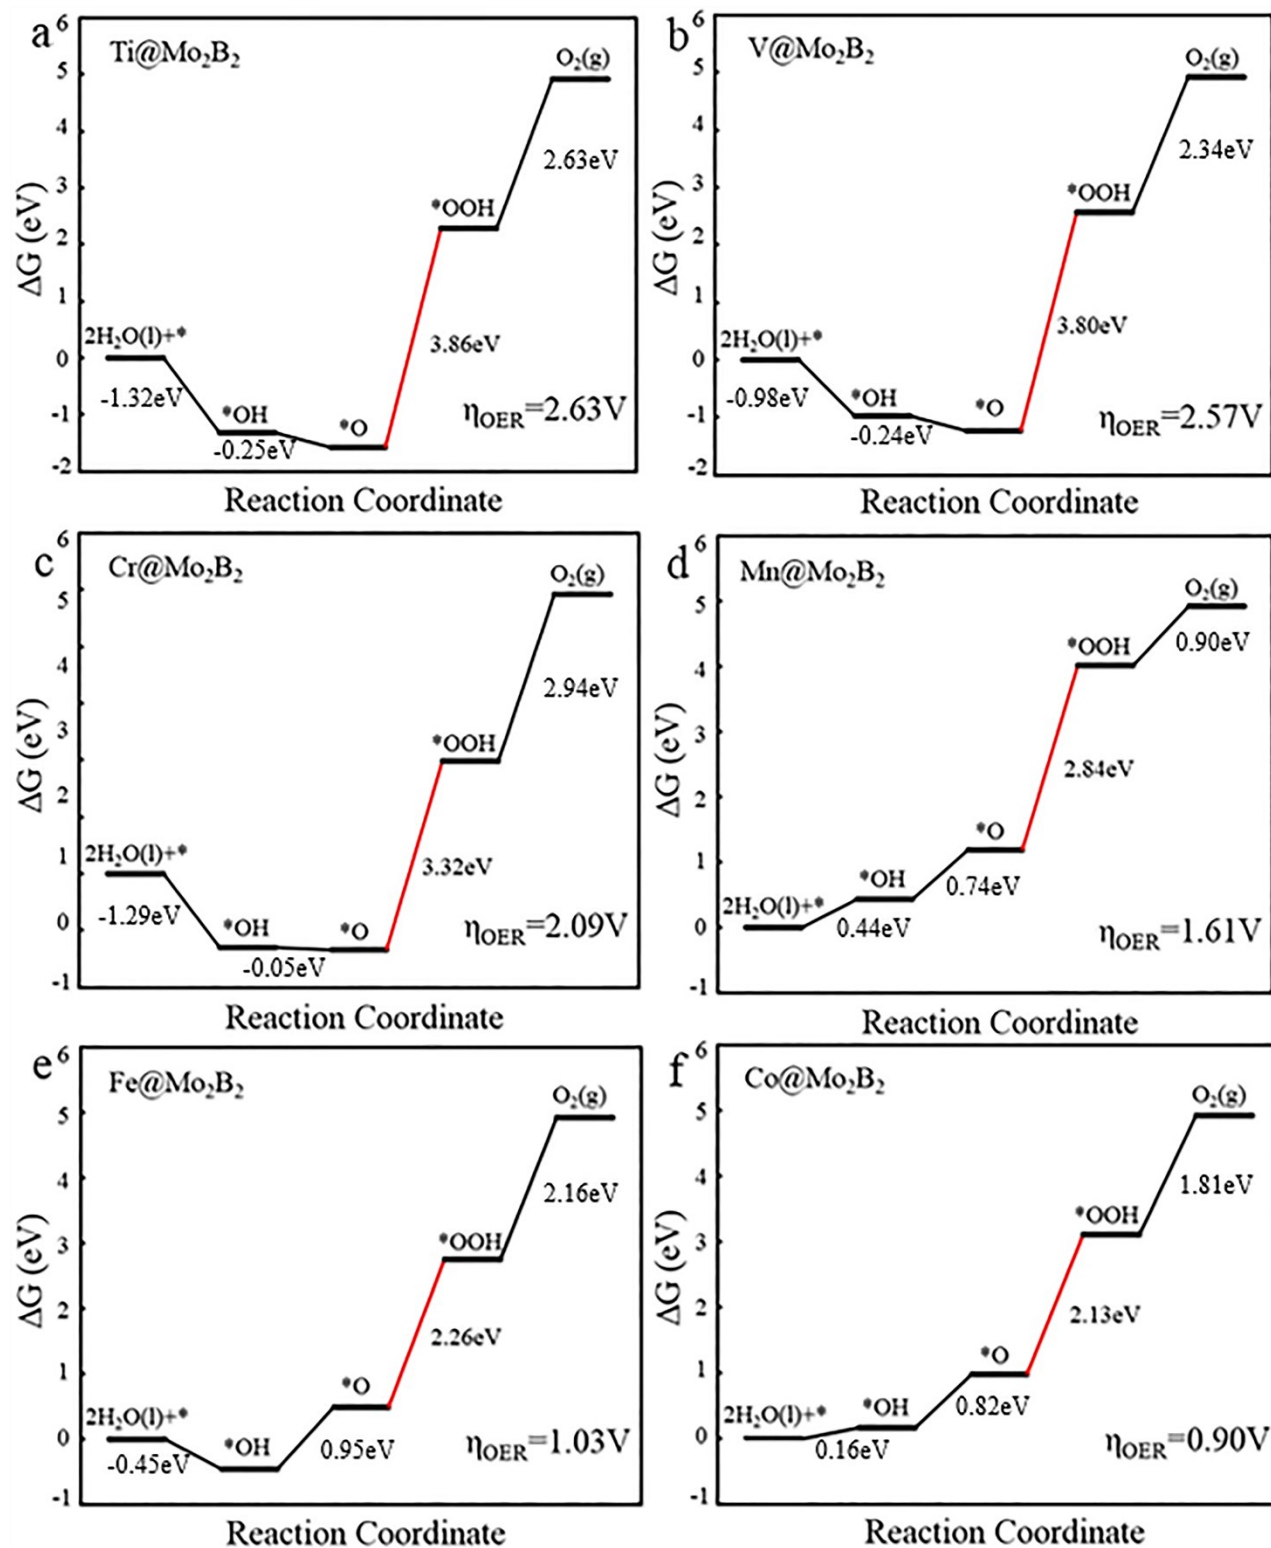

**Fig. S3** Free energy diagram for the OER pathway of (a) Ti@Mo<sub>2</sub>B<sub>2</sub>, (b) V@Mo<sub>2</sub>B<sub>2</sub>, (c) Cr@Mo<sub>2</sub>B<sub>2</sub>, (d) Mn@Mo<sub>2</sub>B<sub>2</sub>, (e) Ti@Mo<sub>2</sub>B<sub>2</sub> and (f) Co@Mo<sub>2</sub>B<sub>2</sub> at site I, where the red lines represent the most energy-consuming step of OER.

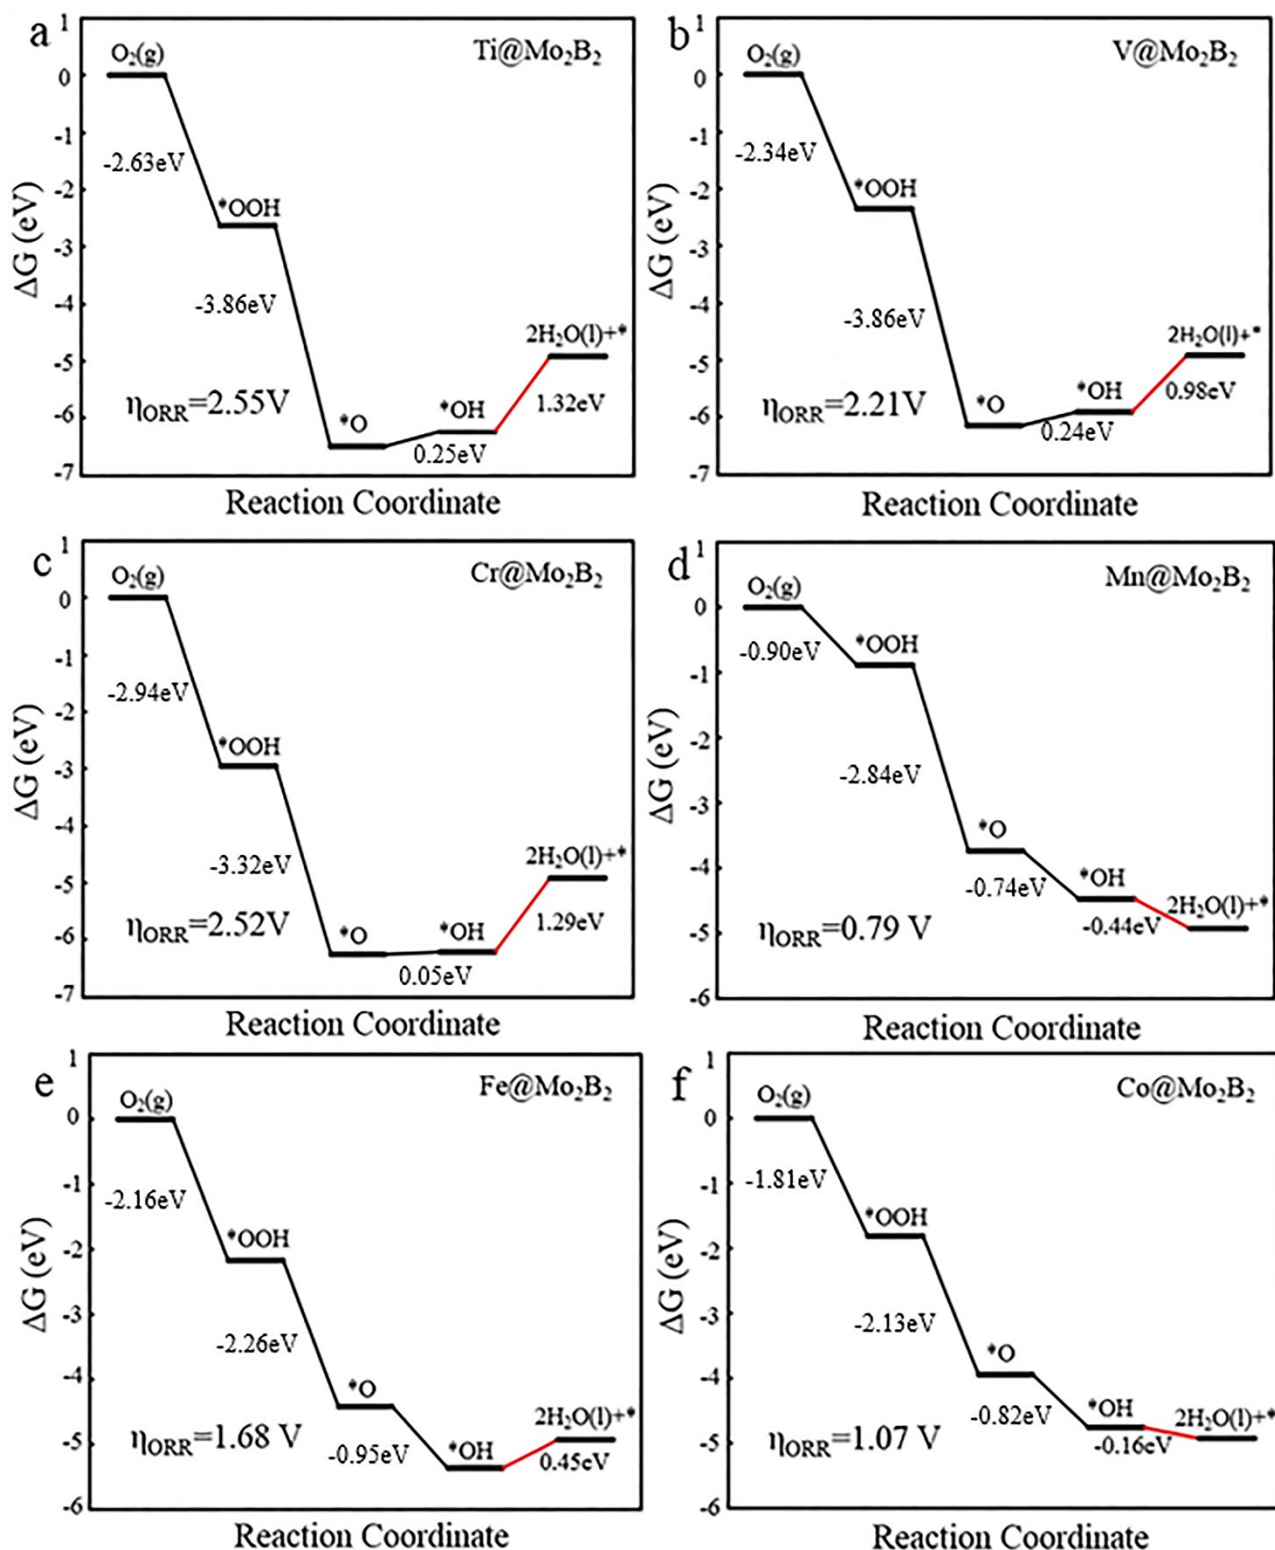

**Fig. S4** Free energy diagram for the ORR pathway of (a)  $\text{Ti}@Mo_2B_2$ , (b)  $\text{V}@Mo_2B_2$ , (c)  $\text{Cr}@Mo_2B_2$ , (d)  $\text{Mn}@Mo_2B_2$ , (e)  $\text{Ti}@Mo_2B_2$  and (f)  $\text{Co}@Mo_2B_2$  at site I, where the red lines represent the most energy-consuming step of ORR.



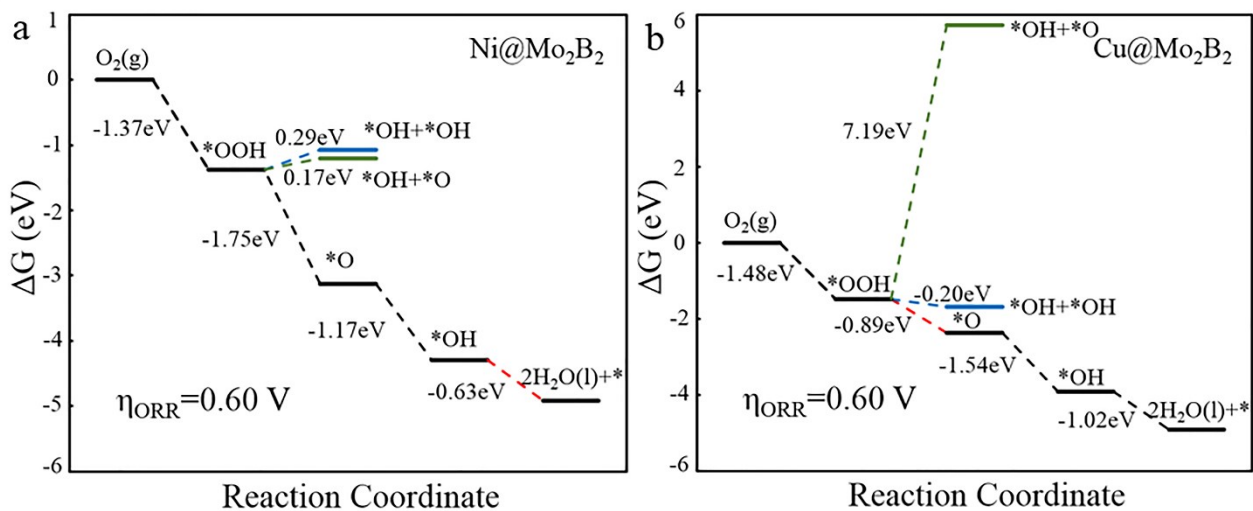

**Fig.S5** The Gibbs free energy diagrams for the processes of forming \*O, \*OH+\*OH and \*OH+\*O from \*OOH for (a) Ni@Mo<sub>2</sub>B<sub>2</sub> and (b) Cu@Mo<sub>2</sub>B<sub>2</sub> at site I, where the blue lines represent the pathway of forming \*OH+\*OH from \*OOH, the green lines represent the pathway of forming \*OH+\*O from \*OOH, the black lines represent the pathway of forming \*O from \*OOH, and the red dashed lines represent the most energy-consuming step of ORR.

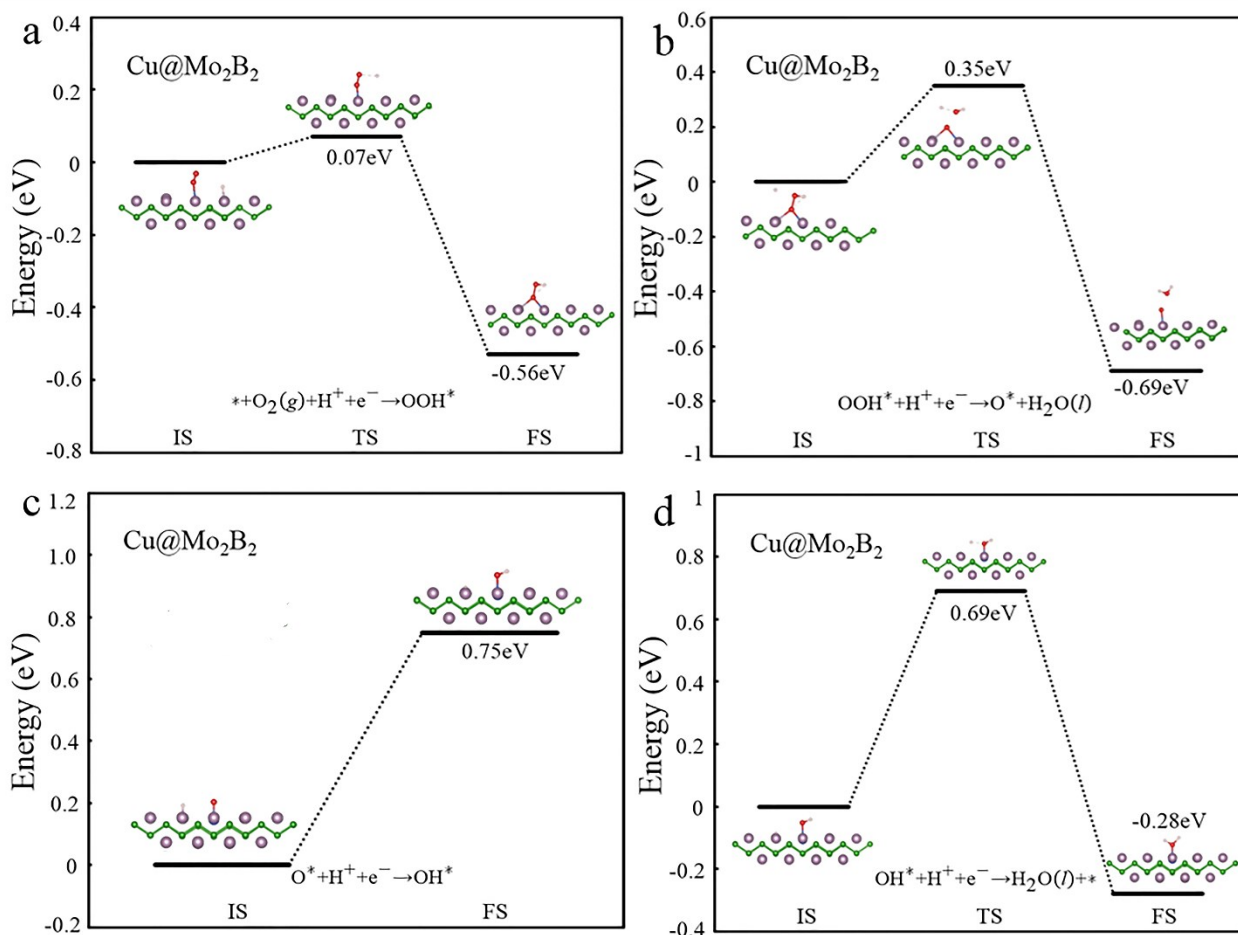

**Fig. S6** Energy barrier of four elementary steps for ORR: (a)

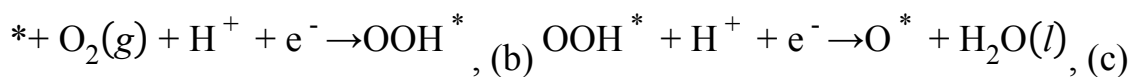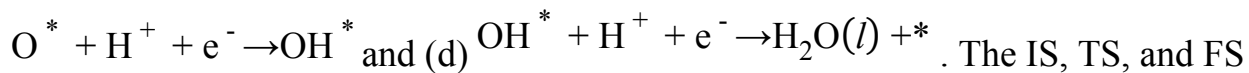

represents initial state, transition state, and final state, respectively. It should be noted

that if we reverse the IS and FS, the energy barrier of elementary steps for OER can be obtained.

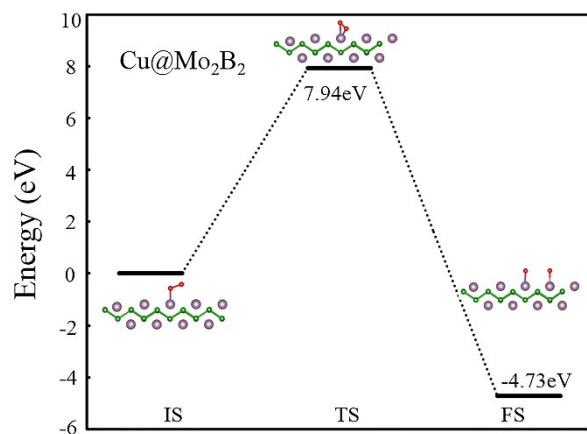

**Fig. S7** Energy profile for the O<sub>2</sub> dissociation reaction on the surface of Cu@Mo<sub>2</sub>B<sub>2</sub>.

The IS, TS, and FS represents initial state, transition state, and final state, respectively.

## The strategy of dual volcano plots

By linear fitting, the linear relationship between  $\Delta G_{O^*}$  and  $\Delta G_{OH^*}$  is obtained:

$$\Delta G_{O^*} = 1.69\Delta G_{OH^*} + 0.74 \quad (S1)$$

Therefore, the overpotential ( $\eta$ ) for the ORR processes determined by the maximum free energy change of the four elementary steps obeys the following equations:

$$\eta = -\Delta G_{OH^*}/e + 1.23 \text{ V} \quad (\Delta G_{OH^*} < 1.76\text{eV}) \quad (S2)$$

$$\eta = 1.01\Delta G_{OH^*}/e - 1.15 \text{ V} \quad (\Delta G_{OH^*} > 1.76\text{eV}) \quad (S3)$$

The overpotential ( $\eta$ ) for the OER process obeys the equations:

$$\eta = -1.01\Delta G_{OH^*}/e + 1.15 \text{ V} \quad (\Delta G_{OH^*} < 0.96\text{eV}) \quad (S4)$$

$$\eta = 0.69\Delta G_{OH^*}/e - 0.49 \text{ V} \quad (0.96\text{eV} < \Delta G_{OH^*} < 2.39\text{eV}) \quad (S5)$$

$$\eta = \Delta G_{OH^*}/e - 1.23 \text{ V} \quad (\Delta G_{OH^*} > 2.39\text{eV}) \quad (S6)$$
